# Supplementary material for: Reactivation of Myc transcription in the mouse heart unlocks its proliferative capacity
Source: PubMed Central journal article supplement (PMC7156407; doi:10.1038/s41467-020-15552-x), 2020-04-14
Supplement: 41467_2020_15552_MOESM1_ESM.pdf [file 41467_2020_15552_MOESM1_ESM.pdf]

## Supplementary Information

# **Reactivation of Myc transcription in the mouse heart unlocks its proliferative capacity**

Bywater et al.

Correspondence to: chw39@cam.ac.uk and gie20@cam.ac.uk

### **This PDF file includes:**

Supplementary Figures 1-9  
Supplementary Table 1

## Supplementary Figures:

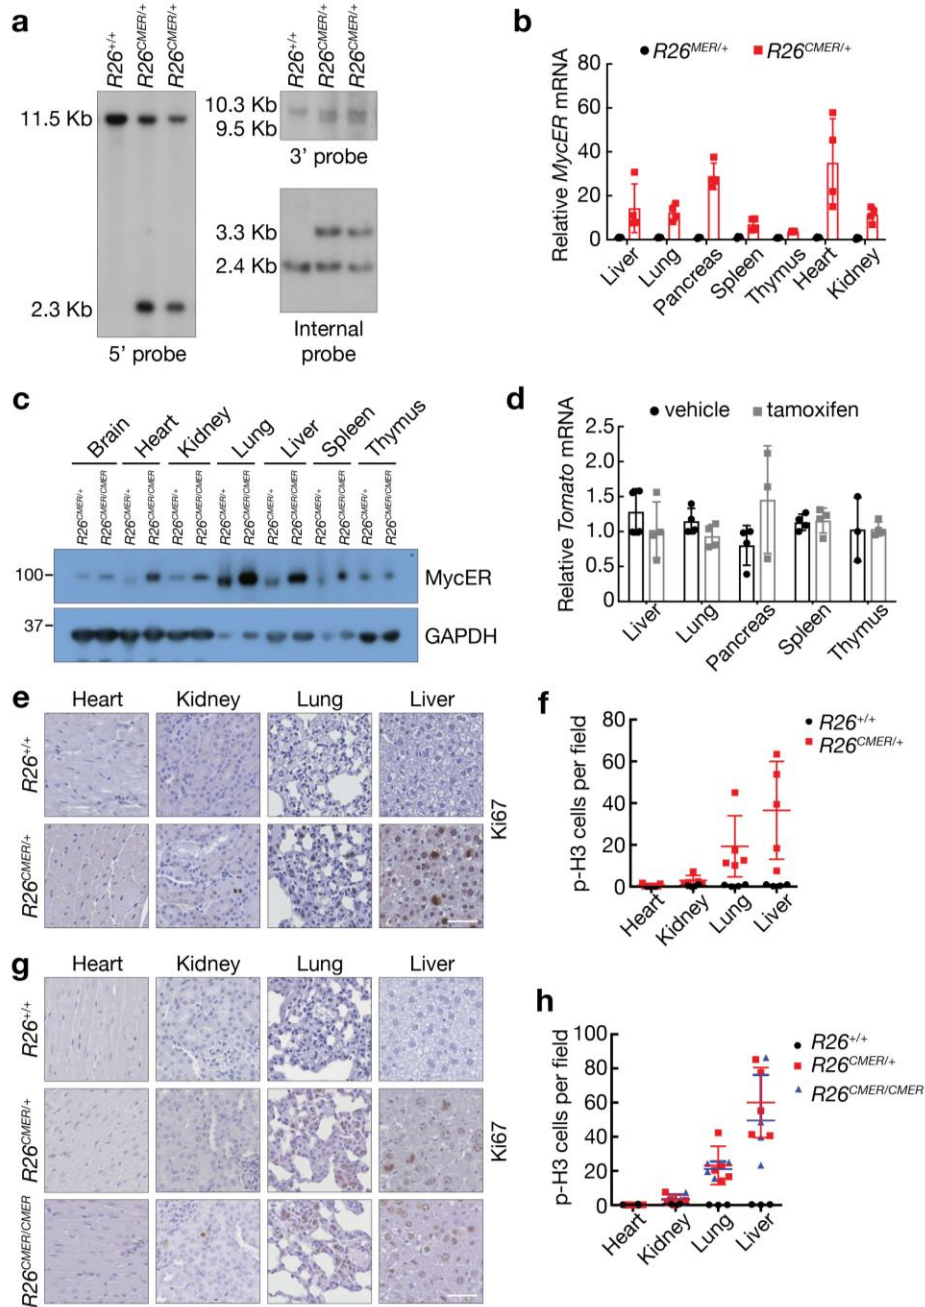

### Supplementary Figure 1: Design and validation of a MycER<sup>TM</sup> mouse

**a.** Southern blot analysis from  $R26^{+/+}$  wild-type and  $R26^{CMER/+}$  mice, analysed with 5' (EcoRI), 3' (EcoRI/Sall) and internal (BamHI) probes. Wild-type fragments (11.5 kb, 5'; 10.3 kb, 3' and 2.4 kb, internal) targeted fragments (2.3 kb, 5'; 9.5 kb, 3' and 3.3 kb, internal). Representative results from 96 independent ES cell clones, later confirmed germline transmission in mice. **b.**

Quantitative RT-PCR analysis of *MycER* in  $R26^{MER/+}$  ( $n=4$ ) and  $R26^{CMER/+}$  ( $n=4$ ) liver, lung, pancreas, spleen, thymus, heart and kidney. Expression is relative to the respective  $R26^{MER/+}$ . Mean and s.e.m. shown. **c.** Immunoblot analysis of  $MycER^{T2}$  expression in the brain, heart, kidney, lung, pancreas, liver, spleen and thymus isolated from  $R26^{CMER/+}$  and  $R26^{CMER/CMER}$  mice. Represents the results from 2 individual mice. **d.** Quantitative RT-PCR analysis of *Tomato* in  $R26^{CMER/mTmG}$  liver, lung, spleen, pancreas, and thymus ( $n=4$ , except pancreas tamoxifen and spleen oil  $n=3$ ) isolated 4 hours post administration of oil or tamoxifen. Expression is relative to the respective vehicle control. Mean and s.e.m shown. **e.** Immunohistochemistry of Ki67 in the heart, kidney, lung and liver isolated from wild-type ( $R26^{+/+}$ ) and  $R26^{CMER/+}$  mice 72 hours post administration of tamoxifen. Representative images based on analysis of 4 independent mice. **f.** Quantification of p-H3 positive nuclei per field of view of the heart, kidney, lung and liver (positive hepatocyte nuclei only) isolated from wild-type ( $R26^{+/+}$ ,  $n=4$ ) and  $R26^{CMER/+}$  ( $n=5$ ) mice 72 hours post administration of tamoxifen. Means are taken from 5 images per mouse; Mean and s.d. shown. **g.** Immunohistochemical staining of Ki67 in the heart, kidney, lung and liver isolated from wild-type ( $R26^{+/+}$ ),  $R26^{CMER/+}$  and  $R26^{CMER/CMER}$  mice 24 hours post administration of tamoxifen Representative images based on analysis of at least 3 independent mice. **h.** Quantification of p-H3 positive nuclei per field of view of the heart, kidney, lung and liver (positive hepatocyte nuclei only) isolated from wild-type ( $R26^{+/+}$ ,  $n=3$ ),  $R26^{CMER/+}$  ( $n=5$ ) and  $R26^{CMER/CMER}$  ( $n=4$ ) mice 24 hours post administration of tamoxifen. Means are taken from 5 images per mouse; Mean and s.d. shown. In all cases scale bars represents 50 $\mu$ m and replicate samples are derived from independent mice. Source data are provided as a Source Data file.

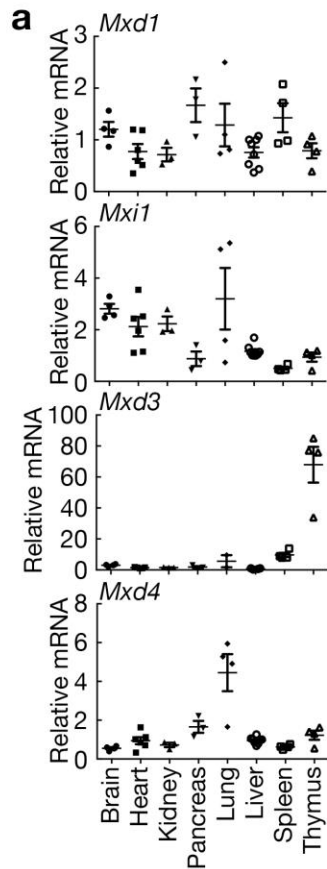

**Supplementary Figure 2: Mxd expression across tissues**

**a.** Quantitative RT-PCR analysis of *Mxd1*, *Mxi1*, *Mxd3* and *Mxd4* in wild-type brain (n=4), heart (n=6), kidney (n=3), pancreas (n=4 except n=2 for *Mxd3*), lung (n=3), liver (n=8 except n=4 for *Mxd3*), spleen (n=4) and thymus (n=4). Expression is relative to liver. Mean and s.e.m. shown. Replicate samples are derived from independent mice. Source data are provided as a Source Data file.

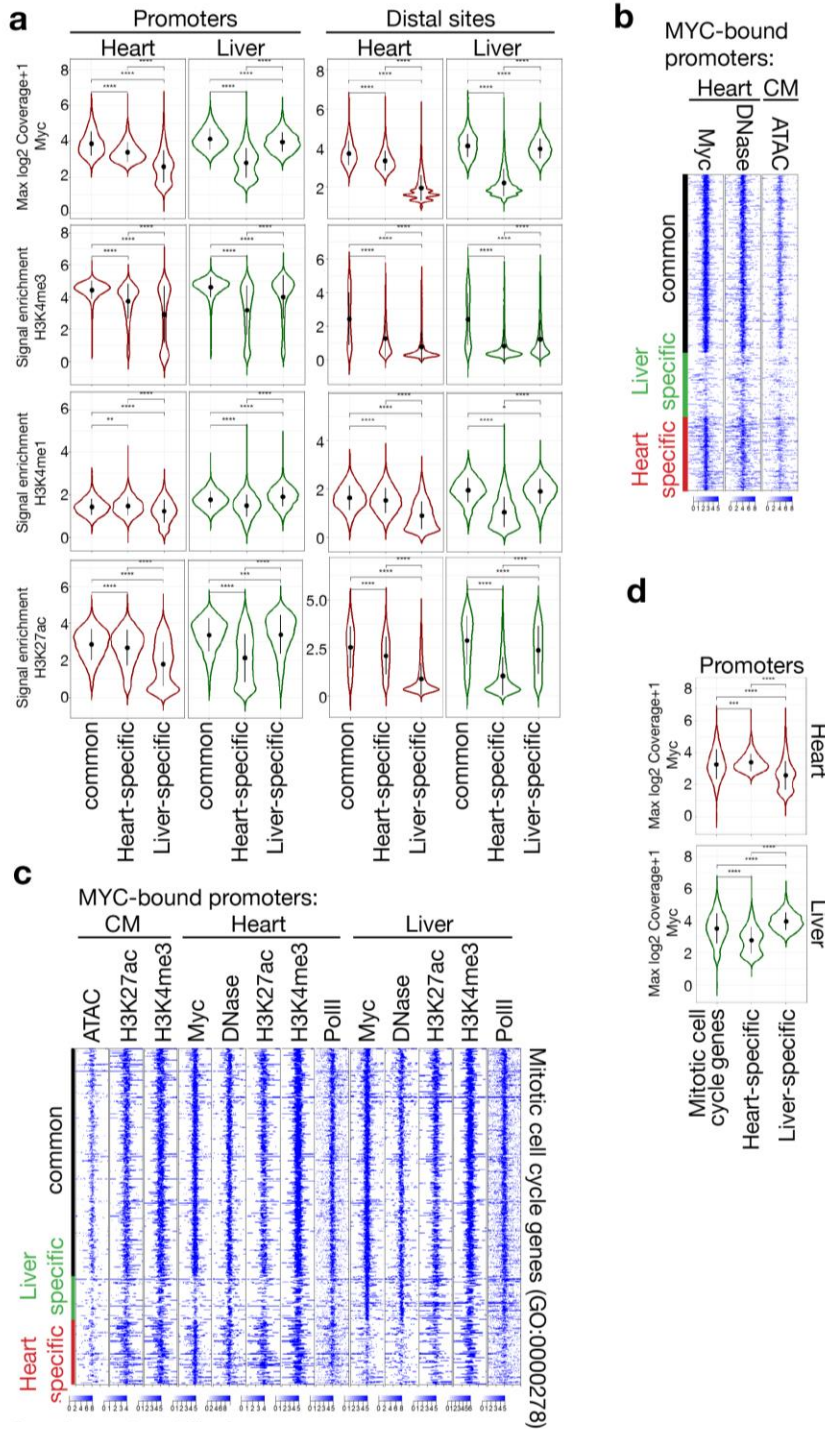

**Supplementary Figure 3: Myc binding in the heart and liver**

**a.** Violin plots providing quantitative visualization of the read coverage of Myc, H3K4me3, H3K27ac and H3K4me1 at promoter and distal elements of common versus heart or liver tissue specific sites. P-values are derived by pairwise two-sided Mann-Whitney  $P \leq 0.05^*$ ,  $P \leq 0.01^{**}$ ,

$P \leq 0.001^{***}$  and  $P \leq 0.0001^{****}$ . Plot shows distribution (violin), mean (black dot) and standard deviation (bar). **b.** Heat map of peaks called for ATAC seq of cardiomyocytes, DNase treated chromatin from whole heart and Myc ChIP sequencing on whole heart at Myc-bound promoter elements that are common between both the liver and heart (common-black) or specific for an individual tissue (liver specific-green, heart specific-red). Myc ChIP sequencing performed on the heart isolated from  $R26^{CMER/+}$  mice 4 hours post administration of 4-OHT, overlap of  $n=2$ . **c.** Heat map of peaks called for ATAC seq, acetylated H3K27 (H3K27ac) and tri-methylated H3K4 (H3K4me3) ChIP sequencing on purified cardiomyocytes (CM) compared to peaks called by DNase treated, acetylated H3K27 (H3K27ac), tri-methylated H3K4 (H3K4me3) and RNA Polymerase II (PolII) ChIP sequencing on whole heart (Heart) and liver (Liver) at Mitotic Cell Cycle genes (GO Biological process gene set 0000278) with Myc-bound promoter elements that are common between both the liver and heart (common-black) or specific for an individual tissue (liver specific-green, heart specific-red). Myc ChIP sequencing was performed on the heart and livers isolated from  $R26^{CMER/+}$  mice 4 hours post administration of 4-OHT, overlap of  $n=2$ . PolII ChIP sequencing performed on the heart and livers isolated from wild-type ( $R26^{+/+}$ ) mice, overlap of  $n=2$ . **d.** Violin plots providing quantitative visualization of the read coverage of Myc at promoters of Mitotic cell cycle genes (GO: 0000278) and promoters specifically bound by Myc in the heart or liver. P-values are derived by pairwise two-sided Mann-Whitney  $P \leq 0.001^{***}$  and  $P \leq 0.0001^{****}$ . Plot shows distribution (violin), mean (black dot) and standard deviation (bar). ChIP sequencing data for DNase treated, H3K27ac and H3K4me3 were taken from the ENCODE Project (accession numbers; GSM1014166, GSM1000093, GSM769017, GSM1014195, GSM1000140, GSM769014), cardiomyocyte ATAC sequencing accession: GSE95763, cardiomyocyte H3K27ac and H3K4me3 ChIP sequencing accession: SRP033385. Source data are provided as a Source Data file.

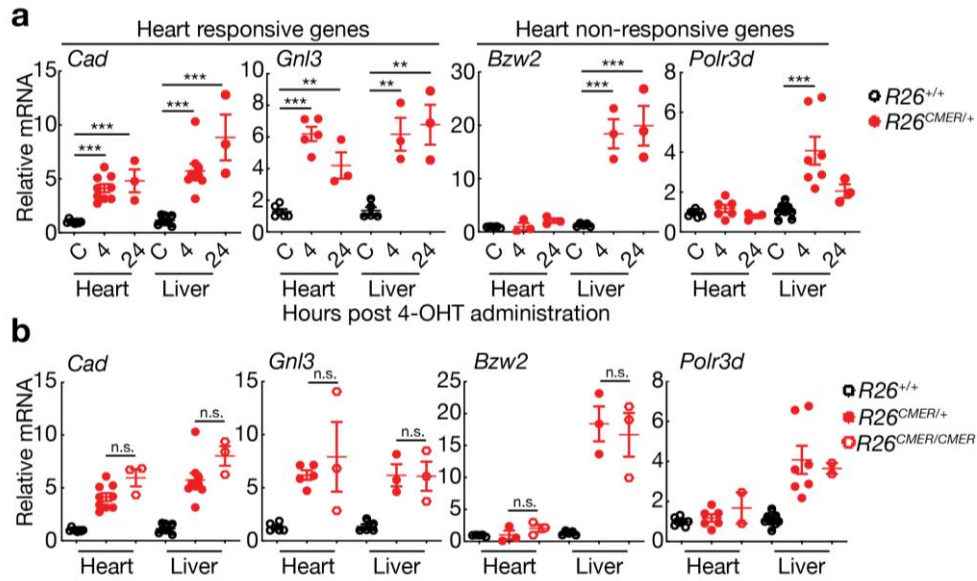

**Supplementary Figure 4: The transcriptional responses to activation of ectopic Myc**

**a.** Quantitative RT-PCR analysis of *Cad*, *Gnl3*, *Bzw2* and *Polr3d* in hearts and livers isolated from wild-type ( $R26^{+/+}$ ,  $n=8$  *Cad*, *Polr3d*,  $n=5$  *Gnl3*, *Bzw2*) and  $R26^{CMER/+}$  ( $n=9$  *Cad*,  $n=5$  heart *Gnl3*,  $n=5$  liver *Gnl3*,  $n=3$  *Bzw2*,  $n=6$  heart *Polr3d*,  $n=7$  liver *Polr3d*) mice at either 4 or 24 ( $n=3$ ) hours post administration of 4-OHT. Expression is relative to the respective control (C). Mean and s.e.m. shown. One Way ANOVA with Tukey's multiple comparisons test; heart  $R26^{+/+}$  control vs 4 hour  $R26^{CMER/+}$ :  $P<0.001^{***}$  (*Gnl3*),  $P<0.01^{**}$  (*Cad*), heart  $R26^{+/+}$  control vs 24 hour  $R26^{CMER/+}$ :  $P<0.05^*$  (*Gnl3*),  $P<0.01^{**}$  (*Cad*), liver  $R26^{+/+}$  control vs 4 hour  $R26^{CMER/+}$ :  $P<0.001^{***}$  (*Gnl3*, *Cad*, *Bzw2*, *Polr3d*), liver  $R26^{+/+}$  control vs 24 hour  $R26^{CMER/+}$ :  $P<0.001^{***}$  (*Gnl3*, *Cad*, *Bzw2*). Replicate samples are derived from independent mice. **b.** Quantitative RT-PCR analysis of *Cad*, *Gnl3*, *Bzw2* and *Polr3d* in hearts isolated from wild-type ( $R26^{+/+}$ ,  $n$  as above),  $R26^{CMER/+}$  ( $n$  as above) and  $R26^{CMER/CMER}$  ( $n=3$  except *Polr3d*  $n=2$ ) mice 4 hours post administration of 4-OHT. Expression relative to the wild-type control. Mean and s.e.m. shown. One-Way ANOVA with Tukey's multiple comparisons test;  $P>0.05^{n.s.}$  for all comparisons between  $R26^{CMER/+}$  and  $R26^{CMER/CMER}$ . Replicate samples are derived from independent mice. Source data are provided as a Source Data file.



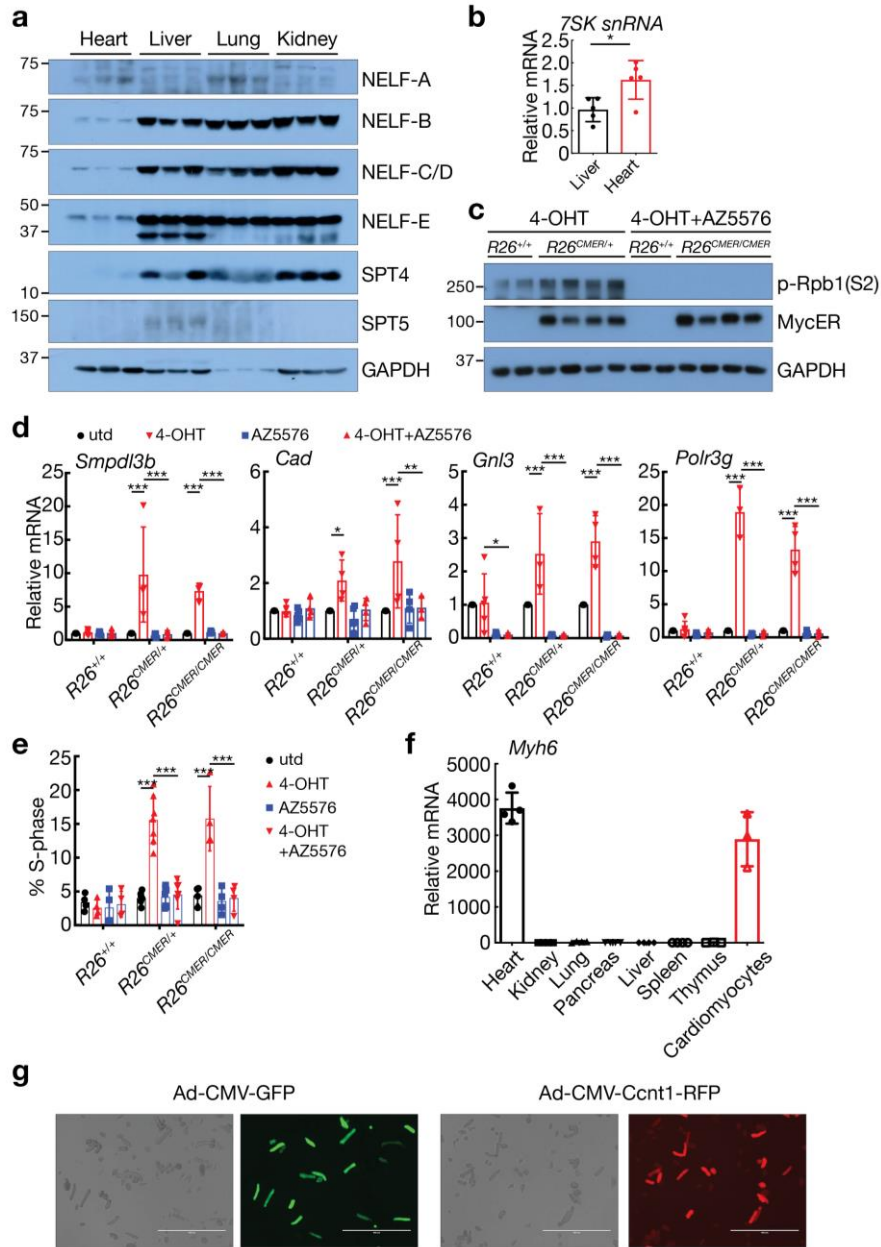

**Supplementary Figure 5: The transcriptional activity of Myc is limited by P-TEFb availability**

**a.** Immunoblot analysis of NELF-A, NELF-B, NELF-C/D, NELF-E, SPT4 and SPT5 expression in the heart, liver, lung and kidney isolated from wild-type (*R26*<sup>+/+</sup>) mice. **b.** Quantitative RT-PCR analysis of *7SK snRNA* in liver and heart isolated from wild-type mice (*n*=5). Expression is relative to liver. Mean and s.e.m. shown. Unpaired t-test; liver vs heart *P*= 0.019\*. **c.** Immunoblot analysis of the C-terminal domain of RNA Polymerase II, phosphorylated (p-Rpb1(S2)), and MycER<sup>T2</sup> protein expression in wild-type (*R26*<sup>+/+</sup>), *R26*<sup>CMER/+</sup> or *R26*<sup>CMER/CMER</sup>



MEFs in culture, isolated four hours post addition of 100 nM 4-OHT either alone (4-OHT) or in combination with 1 $\mu$ M AZ-5576 (4-OHT+AZ5576).. **d.** Quantitative RT-PCR analysis of *Smpdl3b*, *Cad*, *Gnl3* and *Polr3g* in wild-type ( $R26^{+/+}$ ,  $n=5$ , except 4-OHT+AZ5576  $n=4$ ),  $R26^{CMER/+}$  (*Smpdl3b*, *Cad*;  $n=5$ , except 4-OHT+AZ5576 and 4OHT  $n=4$ . *Gnl3* and *Polr3g*  $n=4$  except 4-OHT  $n=3$ ) or  $R26^{CMER/CMER}$  ( $n=4$ , except 4-OHT+AZ5576  $n=3$ ) MEFs cultured in serum deplete media, either untreated (utd) or isolated 4 hours post addition of 100 nM 4-OHT or 1  $\mu$ M AZ-5576 (AZ5576) either alone or in combination (4-OHT+AZ5576). Expression is relative to the respective untreated control (utd). Mean and s.d. shown. Two Way ANOVA with Tukey's multiple comparisons test; utd vs 4-OHT:  $P=0.001^{***}$  (*Smpdl3b*:  $R26^{CMER/+}$ ,  $R26^{CMER/CMER}$ ; *Cad*:  $R26^{CMER/CMER}$ ; *Gnl3*:  $R26^{CMER/CMER}$ ; *Polr3g*:  $R26^{CMER/+}$ ,  $R26^{CMER/CMER}$ ), 0.05\* (*Cad*:  $R26^{CMER/+}$ ; *Gnl3*:  $R26^{CMER/+}$ ); 4-OHT vs 4-OHT+AZ5576:  $P=0.001^{***}$  (*Smpdl3b*:  $R26^{CMER/+}$ ,  $R26^{CMER/CMER}$ ; *Gnl3*:  $R26^{CMER/+}$ ,  $R26^{CMER/CMER}$ ; *Polr3g*:  $R26^{CMER/+}$ ,  $R26^{CMER/CMER}$ ), 0.01\*\* (*Cad*:  $R26^{CMER/CMER}$ ).. **e.** Flow cytometry analysis of DNA content in wild-type ( $R26^{+/+}$ ,  $n=4$ ),  $R26^{CMER/+}$  ( $n=7$ ) or  $R26^{CMER/CMER}$  ( $n=4$ ) MEFs cultured in serum deplete media, either untreated (utd) or isolated 16 hours post addition of 100 nM 4-OHT or 1 $\mu$ M AZ-5576 (AZ5576) either alone or in combination (4-OHT+AZ5576). Mean and s.d. shown Two Way ANOVA with Tukey's multiple comparisons test; utd vs 4-OHT:  $P=0.001^{***}$  ( $R26^{CMER/+}$ ,  $R26^{CMER/CMER}$ ); 4-OHT vs 4-OHT+AZ5576:  $P=0.001^{***}$  ( $R26^{CMER/+}$ ,  $R26^{CMER/CMER}$ ). **f.** Quantitative RT-PCR analysis of *Myh6* in the heart ( $n=4$ ), kidney ( $n=4$ ), lung ( $n=4$ ), pancreas ( $n=4$ ), liver ( $n=4$ ), spleen ( $n=4$ ) and thymus ( $n=3$ ) of wild-type mice, and cardiomyocytes ( $n=3$ ) isolated from wild-type mice. Expression is relative to liver. Mean and s.e.m. shown. Replicate samples are derived from independent mice. **g.** Phase contrast and fluorescent images of adult cardiomyocytes in culture 48 hours post infection. GFP (Ad-CMV-GFP) or RFP (Ad-AMV-Ccnt1-RFP). Scale bar is 400  $\mu$ m. Representative of infections of 10 independent cardiomyocyte isolations. In all cases, replicate samples are derived from independent mice or MEF lines. Source data are provided as a Source Data file.

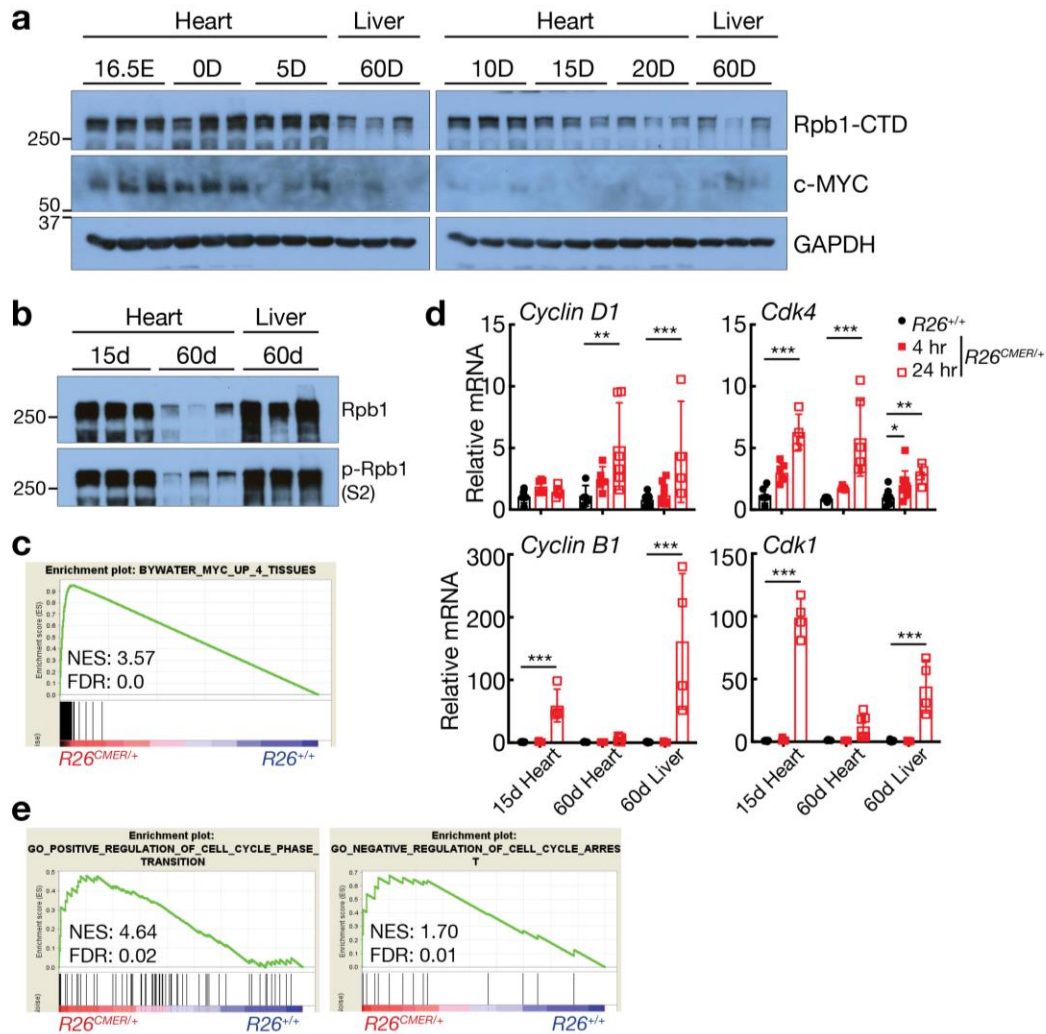

**Supplementary Figure 6: The juvenile heart is permissive for Myc-driven transcriptional activation**

**a.** Immunoblot analysis of the C-terminal domain of RNA Polymerase II, total (Rpb1) and c-Myc protein expression in wild-type heart isolated from embryos at 16.5 days post fertilisation (E16.5), neonates at birth (0D), 5 day (5D), 10 day (10D) 15 day (15D) and 20 day (20D) old mice and wild-type liver isolated from 60 day (60D) old mice. Replicate samples are derived from independent mice. **b.** Longer exposure of Immunoblot shown in Figure. 5a, showing the C-terminal domain of RNA Polymerase II and total (Rpb1) and phosphorylated (p-Rpb1(S2)) expression in wild-type heart and liver isolated from 15 day-old (15d) and 60 day-old (60d) mice. **c.** Enrichment of common Myc targets (liver, lung, kidney and heart) in heart isolated from 15

day  $R26^{CMER/+}$  mice in comparison to controls ( $R26^{+/+}$ ) at 4 hours post administration of 4-OHT, as determined by RNA sequencing. Including normalised enrichment score (NES) and FDR q-value (FDR). **d.** Quantitative RT-PCR analysis of *Cyclin D1*, *Cdk4*, *Cyclin B1* and *Cdk1* in wild-type ( $R26^{+/+}$ ,  $n=6$  15d heart,  $n=5$  60d heart (except *Cdk4*  $n=7$ ),  $n=13$  60d liver) and  $R26^{CMER/+}$  heart isolated from 15 day-old (15d Heart) mice versus heart and liver isolated from 60 day-old (60d Heart)(60d Liver) mice 4 (light grey,  $n=6$  15d heart,  $n=5$  60d heart,  $n=10$  60d liver) or 24 (dark grey,  $n=4$  15d heart,  $n=6$  60d heart,  $n=4$  60d liver) hours post i.p. of 4-OHT. Expression is relative to the respective wildtype ( $R26^{+/+}$ ). Mean and s.d. shown. One Way ANOVA with Tukey's multiple comparisons test; 15d heart  $R26^{+/+}$  vs 24 hour  $R26^{CMER/+}$ :  $P=0.001^{***}$  (*Cdk4*, *Cyclin B1* and *Cdk1*), 60d heart  $R26^{+/+}$  vs 24 hour  $R26^{CMER/+}$ :  $P=0.01^{**}$  (*Cyclin D1*)  $P=0.001^{***}$  (*Cdk4*), 60d liver  $R26^{+/+}$  vs 4 hour  $R26^{CMER/+}$ :  $P=0.05^*$  (*Cdk4*), 60d liver  $R26^{+/+}$  vs 24 hour  $R26^{CMER/+}$ :  $P=0.01^{**}$  (*Cdk4*)  $P=0.001^{***}$  (*Cyclin D1*, *Cyclin B1*, *Cdk1*). Replicate samples are derived from independent mice. **e.** Enrichment of pro-cell cycle progression gene sets in heart isolated from 15 day  $R26^{CMER/+}$  mice in comparison to controls ( $R26^{+/+}$ ) at 4 hours post administration of 4-OHT, as determined by RNA sequencing. Including normalised enrichment score (NES) and FDR q-value (FDR). Source data are provided as a Source Data file.

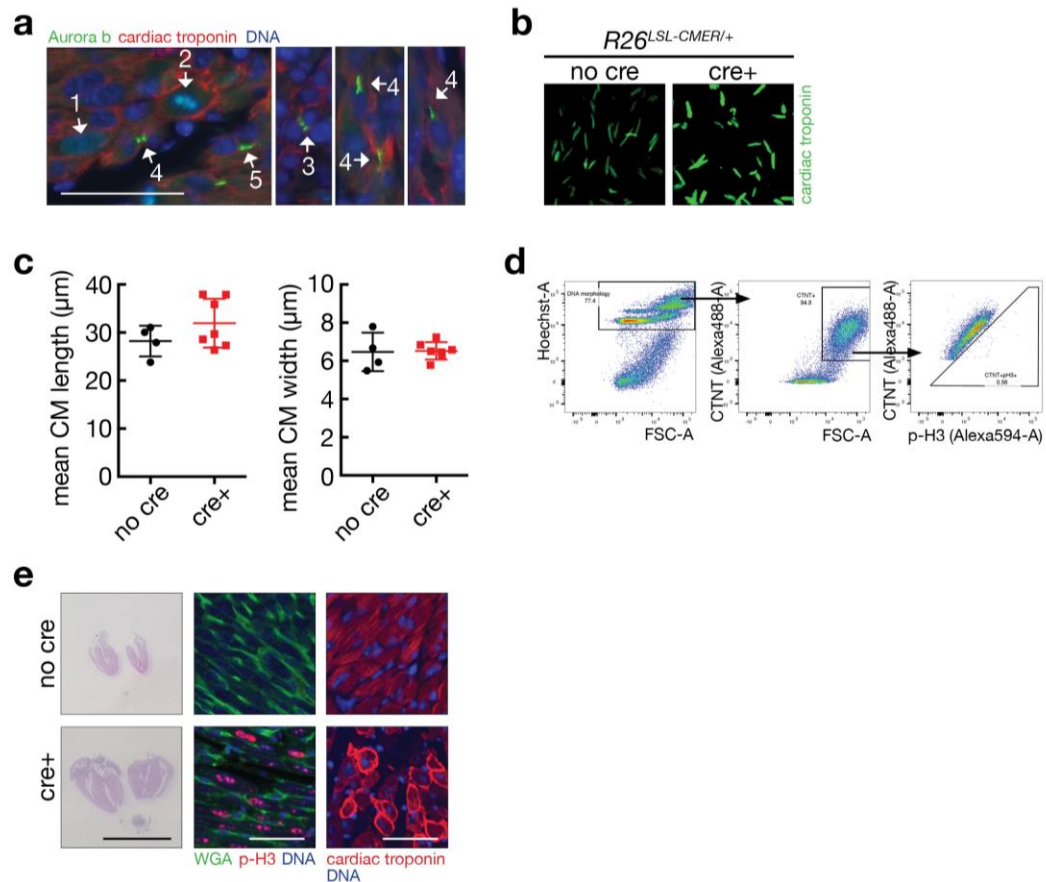

**Supplementary Figure 7: The juvenile heart is permissive to Myc-driven proliferation**

**a.** Immunofluorescent staining of cardiac troponin and Aurora B in the heart of 15 day-old *Myh6-*

*Cre*; *R26<sup>LSL-CMER/+</sup>* mice 48 hours post administration of tamoxifen. Arrows show differences in Aurora B localization throughout the cell cycle. 1- G2, nucleus. 2- Metaphase, metaphase chromosomes. 3- Anaphase, mid-zone. 4- Cytokinesis, centrally located mid-body. 5- Failing cytokinesis- laterally displaced mid-body. Representative images from 3 mice. Scale bar represents 50 $\mu$ m.

**b.** Immunofluorescent staining of cardiac troponin T (green) positive cardiomyocytes isolated from fixed and dissociated hearts of 15 day-old control (*R26<sup>LSL-CMER/+</sup>*; no cre) and *Myh6-Cre*; *R26<sup>LSL-CMER/+</sup>* (*R26<sup>LSL-CMER/+</sup>*; cre+) mice. Representative of staining conducted on cardiomyocytes purified from 11 independent mice. **c.** Quantification of the length and width of cardiomyocytes isolated from the hearts of 15 day-old control (*R26<sup>LSL-CMER/+</sup>*; no cre, n=4) and *Myh6-Cre*; *R26<sup>LSL-CMER/+</sup>* (*R26<sup>LSL-CMER/+</sup>*; cre+, n=6) mice 48 hours post administration of

tamoxifen. Mean determined from the measurement of >13 individual cardiomyocytes per mouse. Mean and s.e.m. shown. One-way Mann Whitney test; no cre vs cre+ P= not significant. Replicate samples are derived from independent mice. **d.** The gating strategy used to determine p-H3 positivity in cardiac troponin (CTNT) positive cardiomyocytes shown in Figure 5h. **e.** Top- H&E staining, middle-WGA and p-H3 immunofluorescent staining, bottom- cardiac troponin immunofluorescent staining of hearts from 15 day-old control ( $R26^{LSL-CMER/+}$ ; no cre) and *Myh6-Cre*;  $R26^{LSL-CMER/+}$  ( $R26^{LSL-CMER/+},cre+$ ) mice 96 hours post administration of tamoxifen. Representative of staining conducted on sections from 8 independent mice. Scale bars represents 1cm (whole heart) and 50 $\mu$ m. Source data are provided as a Source Data file.

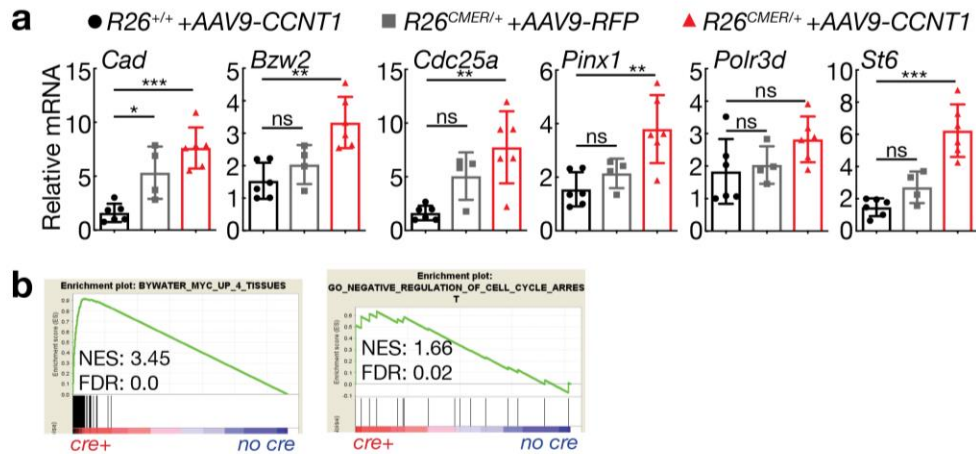

### Supplementary Figure 8: *Ccnt1* overexpression enables Myc driven transcription in adult cardiomyocytes

**a.** Quantitative RT-PCR analysis of *Cad*, *Bzw2*, *Pinx1*, *Polr3d*, *St6* and *Cdc25a* expression in adult wildtype ( $R26^{+/+}$ , n=6) and  $R26^{CMER/+}$  mouse heart isolated 4 weeks post systemic infection with an adeno associated virus encoding either *RFP* (AAV9-*RFP*, n=4) or *Ccnt1* (AAV9-*Ccnt1*, n=6) and 4 hours post administration of 4-OHT. Expression is relative to the respective wild-type. Mean and s.e.m. shown. One-Way ANOVA with Tukey's multiple comparisons test;  $R26^{+/+}$  AAV9-*Ccnt1* vs  $R26^{CMER/+}$  AAV9-*RFP*: P=0.05\* (*Cad*).  $R26^{+/+}$  AAV9-*Ccnt1* vs  $R26^{CMER/+}$  AAV9-*Ccnt1*: P=0.01\*\* (*Bzw2*, *Cdc25a* and *Pinx1*).  $R26^{+/+}$  AAV9-*Ccnt1* vs  $R26^{CMER/+}$  AAV9-*Ccnt1*: P=0.001\*\*\* (*Cad* and *St6*). Replicate samples are derived from independent mice. **b.** Top-enrichment of common Myc targets (liver, lung, kidney and heart), bottom- enrichment of a pro-cell cycle progression gene set in heart isolated from adult *Myh6-Cre*;  $R26^{LSL-CMER/+}$  (cre+) in comparison to control ( $R26^{LSL-CMER/+}$ , no cre), both treated with AAV-CCNT1 4 weeks before administration of 4-OHT (4hr), as determined by RNA sequencing. Including normalised enrichment score (NES) and FDR q-value (FDR). Source data are provided as a Source Data file.

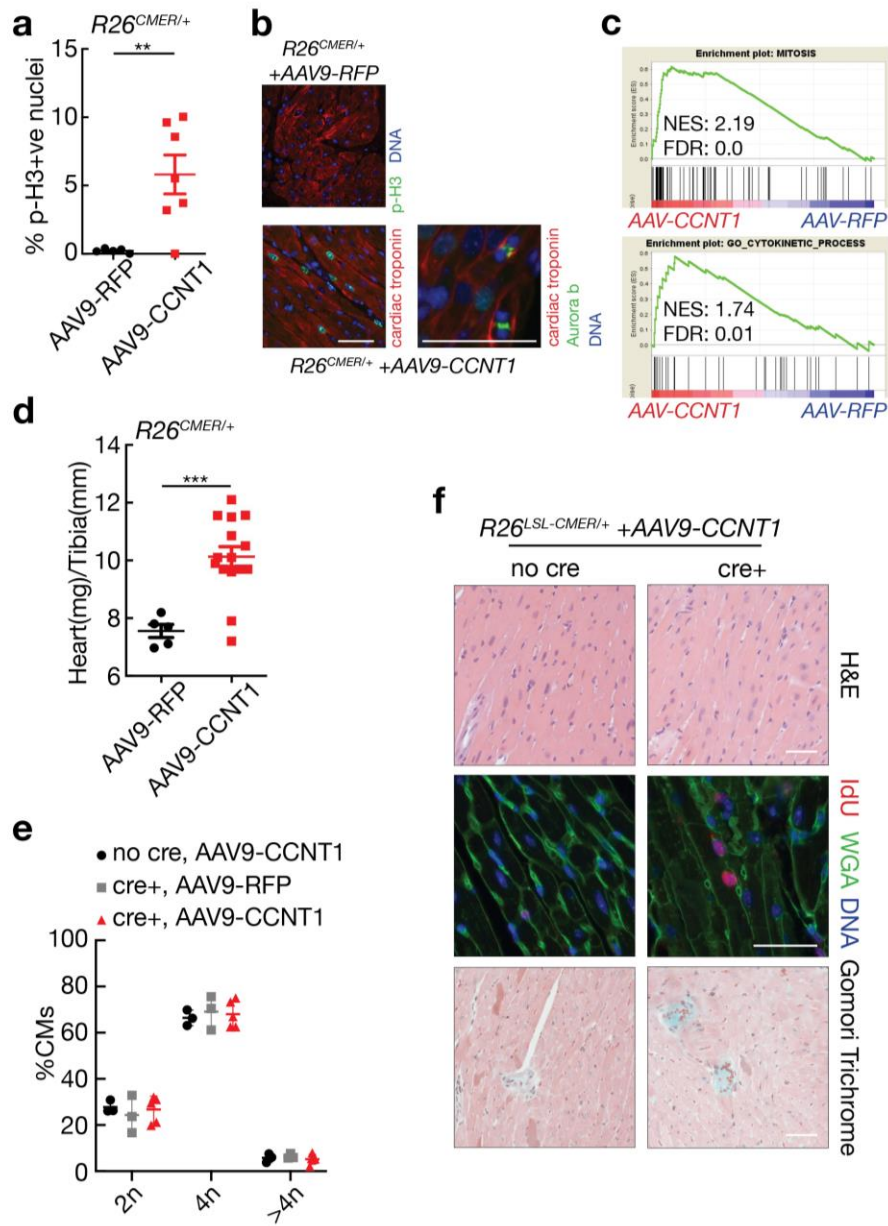

**Supplementary Figure 9: Ccnt1 overexpression enables Myc-driven proliferation in adult cardiomyocytes**

**a.** Quantification of p-H3 positive nuclei per field of view from adult  $R26^{CMER/+}$  mouse hearts isolated 4 weeks post systemic infection with an adeno associated virus encoding either *RFP* (AAV9-*RFP*, n=5) or *Ccnt1* (AAV9-*Ccnt1*, n=7) and 48 hours post administration of tamoxifen. Means are taken from 5 images per mouse; Mean and s.e.m. shown. Unpaired t-test; AAV9-*RFP* vs AAV9-*Ccnt1*,  $P=0.0110$ . **b.** Immunofluorescent staining of cardiac troponin (red), p-H3 (green, left) and Aurora B positive mitotic nuclei (green, right) from adult  $R26^{CMER/+}$  mouse



hearts isolated 4 weeks post infection with an adeno associated virus encoding either *RFP* (*AAV9-RFP*) or *Ccnt1* (*AAV9-Ccnt1*) and 48 hours post administration of tamoxifen. Representative images based on analysis of 5 independent mice. **c.** Enrichment of mitosis and cytokinesis gene sets in heart isolated from adult *Myh6-Cre; R26<sup>LSL-CMER/+</sup>* mice 4 weeks post systemic infection with AAV-CCNT1 verses *AAV-RFP* and 48 hours post administration of tamoxifen, as determined by RNA sequencing. Including normalised enrichment score (NES) and FDR q-value (FDR). **d.** The weight (mg) of hearts isolated from adult *R26<sup>CMER/+</sup>* mouse hearts isolated 4 weeks post infection with an adeno associated virus encoding either *RFP* (*AAV9-RFP*, n=5) or *Ccnt1* (*AAV9-Ccnt1*, n=15) and 48 hours post administration of tamoxifen, expressed as fold change over the length (mm) of a tibia isolated from the same mouse. Mean and s.e.m. shown. Unpaired t-test; *AAV9-RFP* vs *AAV9-Ccnt1*, P=0.0006. Replicate samples are derived from independent mice. **e.** Nuclei quantification performed on images of cardiomyocytes isolated from control (*R26<sup>LSL-CMER/+</sup>*; no cre, n=3) and *Myh6-Cre; R26<sup>LSL-CMER/+</sup>* (*R26<sup>LSL-CMER/+</sup>*; cre+) adult mouse hearts isolated 4 weeks post infection with an adeno associated virus encoding *Ccnt1* (*AAV9-Ccnt1*, n=5) or *RFP* (*AAV9-RFP*, n=3) and 72 hours post administration of tamoxifen. Mean and s.d. shown. One-Way Mann Whitney test; no cre vs cre+ P= 0.0043\*\*. Replicate samples are derived from independent mice. **f.** Left- H&E staining, middle- IdU (BrdU) and WGA immunofluorescent staining and, right- Gomori Trichrome staining from control (*R26<sup>LSL-CMER/+</sup>*; no cre) and *Myh6-Cre; R26<sup>LSL-CMER/+</sup>* (*R26<sup>LSL-CMER/+</sup>*; cre+) adult mouse heart. Mice infected with an adeno associated virus encoding *Ccnt1* (*AAV9-Ccnt1*) at 4 weeks of age, given a single injection of tamoxifen to transiently activate MycER at 8 weeks of age and collected at 16 weeks of age. Representative of staining from 7 independent mice. Scale bars represent 50µm. Source data are provided as a Source Data file.

**Supplementary Table 1. qPCR primers.**

| Oligonucleotides                                                                           | SOURCE              | IDENTIFIER                 |
|--------------------------------------------------------------------------------------------|---------------------|----------------------------|
| Ccnd1; forward 5'- GCGTACCCTGACACCAATCTC -3', reverse 5'- CTCCTCTTCGCACTTCTGCTC -3'        | PrimerBank          | PrimerBank ID: 6680868a1   |
| Cdk4; forward 5'- ATGGCTGCCACTCGATATGAA -3', reverse 5'- TCCTCCATTAGGAACTCTCACAC -3'       | PrimerBank          | PrimerBank ID: 6753380a1   |
| Cdk1; forward 5'- AGAAGGTACTTACGGTGTGGT -3', reverse 5'- GAGAGATTTCCCGAATTGCAGT -3'        | PrimerBank          | PrimerBank ID: 31542366a1  |
| Ccnb1; forward 5'- AAGGTGCCTGTGTGTGAACC -3', reverse 5'- GTCAGCCCCATCATCTGCC -3'           | PrimerBank          | PrimerBank ID: 28195398a1  |
| Cad; forward 5'- CTGCCCGGATTGATTGATGTC -3', reverse 5'- GGTATTAGGCATAGCACAAACCA -3'        | PrimerBank          | PrimerBank ID: 28175177a1  |
| Smpd13b; forward 5'- GCAGGGGCTCAACTAGGGA -3', reverse 5'- GGGGTCTTTGGATACGGTGTA -3'        | PrimerBank          | PrimerBank ID: 118130844c1 |
| Cdc25a; forward 5'- TCCCTGACGAGAATAAATTCCT -3', reverse 5'- TCGATGAGGTGAAAGGTGTCG -3'      | PrimerBank          | PrimerBank ID: 92373435c1  |
| Polr3d; forward 5'- AAAAGCGTGAACGGGACAGG -3', reverse 5'- AATGGGACTGGATCACTTCCG -3'        | PrimerBank          | PrimerBank ID: 256225459c1 |
| Bzw2; forward 5'- AGCGACTGTCTCAGGAATGC -3', reverse 5'- CTGTTCCGGAAGGTCGTT -3'             | This paper          | N/A                        |
| Pinx1; forward 5'- AGCAAGGAGCCACAGAACATA -3', reverse 5'- GGTGAGCAATCCAGTTGTCTT -3'        | This paper          | N/A                        |
| 7SK; forward 5'- GACATCTGTCACCCCATTGA -3', reverse 5'- GCGCAGCTACTCGTATACCC -3'            | This paper          | N/A                        |
| Polr3g; forward 5'- GCCCCTGAAAACGGGAGAAG -3', reverse 5'- TCGGGTGGTTCAATAAAGTACG -3'       | PrimerBank          | PrimerBank ID: 124487176c1 |
| Gnl3; forward 5'- AAAGCGAGTAAACGTATGACCTG -3', reverse 5'- AGCACTATTTGGAACACCTGG -3'       | PrimerBank          | PrimerBank ID: 158517943c1 |
| Mxd4; forward 5'- GGCGACTTCGCAAGGAAGAA -3', reverse 5'- GAGCCTGAGTTTAGCTCGTCT -3'          | PrimerBank          | PrimerBank ID: 31560565c1  |
| Mxd3; forward 5'- GAGGCAGAGCACGGTTATG -3', reverse 5'- TGTAGTGTATCGGGTACAGTCAA -3'         | PrimerBank          | PrimerBank ID: 7710054a1   |
| Mxi1; forward 5'- CACAATGAGTTGAAAAGAACCG -3', reverse 5'- CCAGCGGGATCAGAACTTTCA -3'        | PrimerBank          | PrimerBank ID: 114520598c1 |
| Mxd1; forward 5'- AGATGCCTTCAAACGGAGGAA -3', reverse 5'- CAAGCTCAGAGTGGTGTGTCG -3'         | PrimerBank          | PrimerBank ID: 6754604a1   |
| Myh6; forward 5'- GCCCAGTACCTCCGAAAGTC -3', reverse 5'- GCCTTAACATACTCCTCCTTGTC -3'        | PrimerBank          | PrimerBank ID: 6754774a1   |
| St6galnac4; forward 5'- TGGTCTACGGGGATGGTCA -3', reverse 5'- CTGCTCATGCAAACGGTACAT -3'     | This paper          | N/A                        |
| MycER; forward 5'- ATTTCTGAAGACTTGTTCGGAAA -3', reverse 5'- GCTGTTCTTAGAGCGTTTGATCATGA -3' | Murphy et al., 2008 | N/A                        |
| Tomato; forward 5'- ACCTCCCACAACGAGGACTA -3', reverse 5'- GAGGTGATGTCCAGCTTGGT -3'         | This paper          | N/A                        |
| Uck2; forward 5'- CGAAGGGATCCTAGCCTTCT -3', reverse 5'- TTTTCGCTGATGTCCCTGAAT -3'          | This paper          | N/A                        |
| Actin; forward 5'- GACGATATCGCTGCGCTGGT-3', reverse 5'- CCACGATGGAGGGAATA-3'               | This paper          | N/A                        |
| Gapdh; forward 5'- AGGTCGGTGTGAACGGATTTG-3', reverse 5'- TGTAGACCATGTAGTTGAGGTCA-3'        | This paper          | N/A                        |
