# Supplementary material for: Reactivation of Myc transcription in the mouse heart unlocks its proliferative capacity
Source: PubMed Central journal article supplement (PMC7156407; doi:10.1038/s41467-020-15552-x), 2020-04-14
Supplement: 41467_2020_15552_MOESM4_ESM.pdf [file 41467_2020_15552_MOESM4_ESM.pdf]

## Description of Additional Supplementary Files

### Supplementary Data 1.

Differentially expressed genes in the kidney, liver, lung (n=3) and heart (n=5) of  $R26^{CMER/+}$  mice in comparison to wild-type ( $R26^{+/+}$ ), as determined by RNA sequencing (FDR<0.05 and  $\text{abs}(\log_2\text{FC})>0.5$ ) at 4 hours post administration of 4-OHT.

### Supplementary Data 2.

Enrichr RNA sequencing analysis.

Top 6 Mouse Gene Atlas Gene sets and MGI Mammalian Phenotype Gene sets that significantly overlap with the list of genes that show a differential decrease in expression (DOWN DEGs) only in the kidney (Kidney specific, yellow, n=3) or lung (Lung specific, blue, n=3) or heart (Heart specific, red, n=5) of  $R26^{CMER/+}$  mice in comparison to wild-type ( $R26^{+/+}$ ), as determined by RNA sequencing at 4 hours post administration of 4-OHT.

### Supplementary Data 3.

Differentially expressed genes in the heart of 15 day  $R26^{CMER/+}$  (n=3) mice in comparison to wild-type ( $R26^{+/+}$ , n=3), as determined by RNA sequencing (FDR<0.05 and  $\text{abs}(\log_2\text{FC})>0.5$ ) at 4 hours post administration of 4-OHT.

### Supplementary Data 4.

Differentially expressed genes in the heart of adult mice, 4 weeks post AAV-CCNT1 infection,  $Myh6\text{-cre}; R26^{LSL\text{-}CMER/+}$  (n=3) mice in comparison to;  $R26^{LSL\text{-}CMER/+}$  (n=3), as determined by RNA sequencing (adjp <0.05 and  $\text{abs}(\log_2\text{FC})>0.5$ ) at 4 hours post administration of 4-OHT.

### Supplementary Data 5.

Differentially expressed genes in purified cardiomyocytes of adult mice, 4 weeks post AAV-CCNT1 infection,  $Myh6\text{-cre}; R26^{LSL\text{-}CMER/+}$  (n=3) mice in comparison to;  $R26^{LSL\text{-}CMER/+}$  (n=3), as determined by RNA sequencing (adjp <0.05 and  $\text{abs}(\log_2\text{FC})>0.5$ ) at 4 hours post administration of 4-OHT.

### Supplementary Data 6.

Differentially expressed genes from heart of adult mice, 4 weeks post AAV infection in  $R26\text{-}CMER/+$ ; AAV-RFP (n=3) mice in comparison to;  $R26\text{-}CMER/+$ ; AAV-CCNT1 (n=3), as determined by RNA sequencing (adjp <0.05 and  $\text{abs}(\log_2\text{FC})>0.5$ ) at 44 hours post administration of tamoxifen.

### Supplementary Movie 1.

Movie file generated from 500 aligned TEM images produced using the 3View system of  $Myh6\text{-Cre}; R26^{LSL\text{-}CMER/+}$  heart tissue from a single mouse 48 hours post administration of tamoxifen.

### Supplementary Movie2.

Movie file of 3D visualization of cardiomyocytes in cytokinesis from  $Myh6\text{-Cre}; R26^{LSL\text{-}CMER/+}$  heart tissue 48 hours post administration of tamoxifen. Using IMOD 3D reconstruction and visualization software models were assembled from Z-stack images. Green-outline of cells, blue-nuclei. Pick shows site of cross section through cells shown in Figure 5i.
